# Supplementary material for: Formation of Amadori compounds in LIGAO (concentrated pear juice) processing and the effects of Fru-Asp on cough relief and lung moisturization in mice
Source: Royal Society of Chemistry journal article supplement (doi:10.1039/d2fo02903k), 2022-01-01
Supplement: d2fo02903k2.pdf [file d2fo02903k2.pdf]

Table S1. UPLC-MS/MS performances of 13 ACs, 5-HMF, and Acrylamide.

| Analyte    | Cone voltage (eV) | Collision energy (eV) | Molecular ion | Quantitative m/z |
|------------|-------------------|-----------------------|---------------|------------------|
| Fru-Asp    | 20                | 10                    | 296           | 296 → 278        |
| Fru-Gly    | 15                | 10                    | 238           | 238 → 220        |
| Fru-Ala    | 15                | 15                    | 252           | 252 → 234        |
| Fru-Ser    | 17                | 13                    | 268           | 268 → 250        |
| Fru-Pro    | 25                | 10                    | 278           | 278 → 260        |
| Fru-Val    | 18                | 22                    | 280           | 280 → 216        |
| Fru-Thr    | 17                | 13                    | 282           | 282 → 264        |
| Fru-Leu    | 15                | 20                    | 294           | 294 → 230        |
| Fru-Glu    | 15                | 20                    | 310           | 310 → 148        |
| Fru-Met    | 15                | 10                    | 312           | 312 → 294        |
| Fru-His    | 20                | 16                    | 318           | 318 → 190        |
| Fru-Phe    | 18                | 16                    | 328           | 328 → 292        |
| Fru-Arg    | 30                | 20                    | 337           | 337 → 114        |
| 5-HMF      | 30                | 13                    | 127           | 127 → 109        |
| Acrylamide | 22                | 15                    | 72            | 72 → 55          |

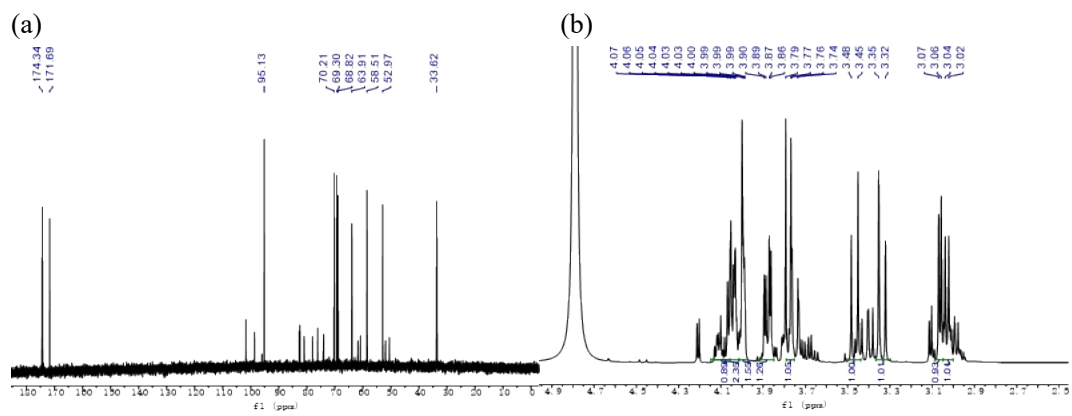

Figure S1.  $^{13}\text{C}$  NMR (a), and  $^1\text{H}$  NMR spectra (b) of the prepared Fru-Asp.

Table S2. Determination of amino acids in pear using amino acid analyzer.

| Amino acid    | Pear                         |
|---------------|------------------------------|
|               | (Absolute Content—mg/100 mL) |
| Asp           | 95.36                        |
| Glu           | 6.99                         |
| Ser           | 2.44                         |
| His           | 1.39                         |
| Gly           | 1.28                         |
| Thr           | 2.53                         |
| Arg           | 1.02                         |
| Ala           | 2.87                         |
| Tyr           | 1.00                         |
| Cys-s         | 0.05                         |
| Val           | 4.72                         |
| Met           | 1.13                         |
| Phe           | 1.15                         |
| Ile           | 1.35                         |
| Leu           | 1.58                         |
| Lys           | 1.61                         |
| Pro           | 5.31                         |
| Total content | 131.79                       |
